## Journal of Public Health

# COVID-19 in Bangladesh: Measuring differences in individual precautionary behaviors among young adults

--Manuscript Draft--

|                                                      |                                                                                                                                                                                                                                                                                                                                                                                                                                                                                                                                                                                                                                                                                                                                                                                                                                                                                                                                                                                                                                                                                                                                                                                                                                                                                                                                                                                                                                                                                                                                                                                                                                                                                                                                                                                                                                                                                                                                                                                                                                                                                                                                                   |
|------------------------------------------------------|---------------------------------------------------------------------------------------------------------------------------------------------------------------------------------------------------------------------------------------------------------------------------------------------------------------------------------------------------------------------------------------------------------------------------------------------------------------------------------------------------------------------------------------------------------------------------------------------------------------------------------------------------------------------------------------------------------------------------------------------------------------------------------------------------------------------------------------------------------------------------------------------------------------------------------------------------------------------------------------------------------------------------------------------------------------------------------------------------------------------------------------------------------------------------------------------------------------------------------------------------------------------------------------------------------------------------------------------------------------------------------------------------------------------------------------------------------------------------------------------------------------------------------------------------------------------------------------------------------------------------------------------------------------------------------------------------------------------------------------------------------------------------------------------------------------------------------------------------------------------------------------------------------------------------------------------------------------------------------------------------------------------------------------------------------------------------------------------------------------------------------------------------|
| <b>Manuscript Number:</b>                            | JOPH-D-20-00546                                                                                                                                                                                                                                                                                                                                                                                                                                                                                                                                                                                                                                                                                                                                                                                                                                                                                                                                                                                                                                                                                                                                                                                                                                                                                                                                                                                                                                                                                                                                                                                                                                                                                                                                                                                                                                                                                                                                                                                                                                                                                                                                   |
| <b>Full Title:</b>                                   | COVID-19 in Bangladesh: Measuring differences in individual precautionary behaviors among young adults                                                                                                                                                                                                                                                                                                                                                                                                                                                                                                                                                                                                                                                                                                                                                                                                                                                                                                                                                                                                                                                                                                                                                                                                                                                                                                                                                                                                                                                                                                                                                                                                                                                                                                                                                                                                                                                                                                                                                                                                                                            |
| <b>Article Type:</b>                                 | Original Article                                                                                                                                                                                                                                                                                                                                                                                                                                                                                                                                                                                                                                                                                                                                                                                                                                                                                                                                                                                                                                                                                                                                                                                                                                                                                                                                                                                                                                                                                                                                                                                                                                                                                                                                                                                                                                                                                                                                                                                                                                                                                                                                  |
| <b>Corresponding Author:</b>                         | Asif Imtiaz, M.S.S.<br>University of Dhaka Faculty of Business Studies<br>Dhaka, Dhaka District BANGLADESH                                                                                                                                                                                                                                                                                                                                                                                                                                                                                                                                                                                                                                                                                                                                                                                                                                                                                                                                                                                                                                                                                                                                                                                                                                                                                                                                                                                                                                                                                                                                                                                                                                                                                                                                                                                                                                                                                                                                                                                                                                        |
| <b>Order of Authors:</b>                             | Asif Imtiaz, M.S.S.<br>Noor Muhammad Khan, M.Sc.<br>Md. Akram Hossain, Ph.D.                                                                                                                                                                                                                                                                                                                                                                                                                                                                                                                                                                                                                                                                                                                                                                                                                                                                                                                                                                                                                                                                                                                                                                                                                                                                                                                                                                                                                                                                                                                                                                                                                                                                                                                                                                                                                                                                                                                                                                                                                                                                      |
| <b>Corresponding Author Secondary Information:</b>   |                                                                                                                                                                                                                                                                                                                                                                                                                                                                                                                                                                                                                                                                                                                                                                                                                                                                                                                                                                                                                                                                                                                                                                                                                                                                                                                                                                                                                                                                                                                                                                                                                                                                                                                                                                                                                                                                                                                                                                                                                                                                                                                                                   |
| <b>Corresponding Author's Institution:</b>           | University of Dhaka Faculty of Business Studies                                                                                                                                                                                                                                                                                                                                                                                                                                                                                                                                                                                                                                                                                                                                                                                                                                                                                                                                                                                                                                                                                                                                                                                                                                                                                                                                                                                                                                                                                                                                                                                                                                                                                                                                                                                                                                                                                                                                                                                                                                                                                                   |
| <b>Corresponding Author's Secondary Institution:</b> |                                                                                                                                                                                                                                                                                                                                                                                                                                                                                                                                                                                                                                                                                                                                                                                                                                                                                                                                                                                                                                                                                                                                                                                                                                                                                                                                                                                                                                                                                                                                                                                                                                                                                                                                                                                                                                                                                                                                                                                                                                                                                                                                                   |
| <b>First Author:</b>                                 | Asif Imtiaz, M.S.S.                                                                                                                                                                                                                                                                                                                                                                                                                                                                                                                                                                                                                                                                                                                                                                                                                                                                                                                                                                                                                                                                                                                                                                                                                                                                                                                                                                                                                                                                                                                                                                                                                                                                                                                                                                                                                                                                                                                                                                                                                                                                                                                               |
| <b>First Author Secondary Information:</b>           |                                                                                                                                                                                                                                                                                                                                                                                                                                                                                                                                                                                                                                                                                                                                                                                                                                                                                                                                                                                                                                                                                                                                                                                                                                                                                                                                                                                                                                                                                                                                                                                                                                                                                                                                                                                                                                                                                                                                                                                                                                                                                                                                                   |
| <b>Order of Authors Secondary Information:</b>       |                                                                                                                                                                                                                                                                                                                                                                                                                                                                                                                                                                                                                                                                                                                                                                                                                                                                                                                                                                                                                                                                                                                                                                                                                                                                                                                                                                                                                                                                                                                                                                                                                                                                                                                                                                                                                                                                                                                                                                                                                                                                                                                                                   |
| <b>Funding Information:</b>                          |                                                                                                                                                                                                                                                                                                                                                                                                                                                                                                                                                                                                                                                                                                                                                                                                                                                                                                                                                                                                                                                                                                                                                                                                                                                                                                                                                                                                                                                                                                                                                                                                                                                                                                                                                                                                                                                                                                                                                                                                                                                                                                                                                   |
| <b>Abstract:</b>                                     | <p><b>Aim:</b> The novel coronavirus disease 2019 (COVID-19) has already hit Bangladesh, and various control measures have been taken to flatten the epidemic curve. Due to the current demographic distribution in Bangladesh, young adults are vital to the demography of the country. Therefore, their precautionary behavior is very important to ensure the success of preventive policies. This exploratory study examined the differences in the adoption of precautionary behaviors among young adults, and estimated and compared the predictors of precautionary behavior adoption among young adults living in the capital city Dhaka and a nearby district, Tangail.</p> <p><b>Subject and Methods:</b> A total of 350 respondents from each district participated in the study. ANOVA and two-sample t-tests were utilized to detect differences in precautionary behavior across demographic groups of young adults, and quantile regression modeling was used to find the predictors of adopting precautionary behaviors and to compare these predictors between the two districts.</p> <p><b>Results:</b> Individuals who had a postgraduate education and had good mental health tended to show better precautionary behaviors in Dhaka. Female respondents from Tangail who had no psychological distress took precautionary behaviors more often than their counterparts. However, no significant differences in the adoption of precautionary behaviors to prevent COVID-19 among young adults were found between the two districts. Better self-control ability, higher education and good mental health emerged as factors that significantly shaped the precautionary behaviors of young adults in this study.</p> <p><b>Conclusion:</b> Having better knowledge did not ensure better adoption of precautionary behaviors among the participants. In effect, the government's strong intervention to keep people at home and distant from each other and continued lockdown for several more days are probable immediate solutions. At the same time, the economic burden on lower-income people should be addressed.</p> |

# COVID-19 in Bangladesh: Measuring differences in individual precautionary behaviors among young adults

Asif Imtiaz, M.S.S.<sup>1</sup>

Noor Muhammad Khan, M.S.C.<sup>2</sup>

Md. Akram Hossain, Ph.D.<sup>3</sup>

*1 Lecturer, Department of Management Information Systems, University of Dhaka, Dhaka-1000, Bangladesh*

*2 Lecturer, Department of Statistics, Mawlana Bhashani Science and Technology University, Santosh, 1902, Tangail, Bangladesh*

*3 Professor, Department of Management Information Systems, University of Dhaka, Dhaka-1000, Bangladesh*

Corresponding Author: Asif Imtiaz; e-mail: [asifimtiaz.mis@du.ac.bd](mailto:asifimtiaz.mis@du.ac.bd)

## Authors' contribution

Asif Imtiaz contributed to the study conception and design. Material preparation, data collection and analysis were performed by Asif Imtiaz, and Noor Muhammad Khan. The first draft of the manuscript was written by Asif Imtiaz and Noor Muhammad Khan. Md. Akram Hossain approved the final version to be published. All authors read and approved the final manuscript.

## Ethical Approval

The study was approved by the research ethics committee of Center for Project Management and Information Systems (PMIS), University of Dhaka. The procedures used in this study adhere to the tenets of the Declaration of Helsinki.

# COVID-19 in Bangladesh: Measuring differences in individual precautionary behaviors among young adults

## Abstract

**Aim:** The novel coronavirus disease 2019 (COVID-19) has already hit Bangladesh, and various control measures have been taken to flatten the epidemic curve. Due to the current demographic distribution in Bangladesh, young adults are vital to the demography of the country. Therefore, their precautionary behavior is very important to ensure the success of preventive policies. This exploratory study examined the differences in the adoption of precautionary behaviors among young adults, and estimated and compared the predictors of precautionary behavior adoption among young adults living in the capital city Dhaka and a nearby district, Tangail.

**Subject and Methods:** A total of 350 respondents from each district participated in the study. ANOVA and two-sample t-tests were utilized to detect differences in precautionary behavior across demographic groups of young adults, and quantile regression modeling was used to find the predictors of adopting precautionary behaviors and to compare these predictors between the two districts.

**Results:** Individuals who had a postgraduate education and had good mental health tended to show better precautionary behaviors in Dhaka. Female respondents from Tangail who had no psychological distress took precautionary behaviors more often than their counterparts. However, no significant differences in the adoption of precautionary behaviors to prevent COVID-19 among young adults were found between the two districts. Better self-control ability, higher education and good mental health emerged as factors that significantly shaped the precautionary behaviors of young adults in this study.

**Conclusion:** Having better knowledge did not ensure better adoption of precautionary behaviors among the participants. In effect, the government's strong intervention to keep people at home and distant from each other and continued lockdown for several more days are probable immediate solutions. At the same time, the economic burden on lower-income people should be addressed.

## Keywords

*COVID-19; Precautionary behavior; Young adults; Self-control; Mental health; Health policy*

## Background

Bangladesh confirmed the detection of its first three novel coronavirus disease 2019 (COVID-19)-positive cases on March 8, 2020, amid the reign of the COVID-19 terror across the globe (Paul 2020). Three days later, the World Health Organization (WHO) declared COVID-19 a pandemic because of its unrelenting and rapid spread around the world (Pogrebna and Kharmalov 2020). Bangladesh reported its first coronavirus death on March 18, 2020. The patient was a senior citizen aged almost 70 years with a history of various medical conditions (Reuters 2020). As of May 9, 2020, COVID-19 had already reached 215 countries, areas or territories affecting 3,822,382 people, among which 263,658 had lost their lives (WHO 2020). By the same date, in Bangladesh, there were 13,770 confirmed cases of COVID-19 and 214 confirmed deaths due to this pandemic (Institute of Epidemiology, Disease Control & Research (IEDCR) 2020).

This disease is currently infecting people at an exponentially increasing rate and can be transmitted by even asymptomatic or presymptomatic persons. These features have made COVID-19 harder to contain than the Middle East Respiratory Syndrome coronavirus (MERS-CoV) or Severe Acute Respiratory Syndrome (SARS-CoV) (Gates 2020). COVID-19 is highly contagious, with fever, dry cough, myalgia, fatigue, and dyspnea as its main clinical symptoms. At the severe stage of this disease, acute respiratory distress syndrome, uncontrolled metabolic acidosis, bleeding and coagulation dysfunction, and septic shock may occur (Chen et al. 2020; Zhong et al. 2020). The most vulnerable population for COVID-19 is older males with underlying diseases such as hypertension, type-2 diabetes, and cardiovascular disease (Chen et al. 2020; Huang et al. 2020). As the situation became critical and serious, the World Health Organization, in response, urged collective efforts of all countries to prevent the rapid spread of COVID-19 (WHO 2020). Moreover, the WHO decided to improve clinical and community-level knowledge regarding COVID-19 while promoting optimized use of protective equipment for infection prevention and control in community settings (WHO 2020). Lowering the predisposition of individual exposure is currently the only way to prevent COVID-19 since there is no vaccine or effective curative method to prevent this pandemic (Pogrebna and Kharmalov 2020). The approaches to reducing its transmission are mostly behavioral: handwashing; social distancing; coughing and sneezing etiquette (Haushofer and Metcalf 2020); and avoidance of touching the eyes, mouth, and nose. Several countries, including Bangladesh, declared a shutdown/lockdown to prevent the spread of COVID-19. Bangladesh deployed armed forces to ensure that people were maintaining social distancing and quarantine (ABC 2020; Daily Star 2020).

People's adherence to these control measures is central to their success, and this adherence heavily relies upon their knowledge, attitudes, and practices toward COVID-19. Moreover, less knowledge and poor attitudes toward contagious diseases can trigger panic emotion, in effect, making matters worse while attempting to prevent the disease from spreading (Ajilore et al. 2017; Person et al. 2004; Tachfouti et al. 2012; Tao 2003). In a study conducted very recently, it was found that Chinese women of relatively high socioeconomic class possessed good knowledge, optimistic attitudes, and performed proper COVID-19 prevention practices during the time when the disease was rising rapidly (Zhong et al. 2020). It is understandable that the people of China adopted intensive precautionary behaviors to prevent COVID-19 (Li et al. 2020), and knowledge is a significant predictor of

1  
2  
3  
4 precautionary behavior adoption in general (Almutairi et al. 2015). Almost all the participants of this prior study  
5 were confident that COVID-19 would be finally controlled, and China would win against the virus. This confidence  
6 and positive attitude among the Chinese are nothing new, since the same pattern was exhibited during the SARS  
7 epidemic (Chen et al. 2003; Liu et al. 2004; Zhong et al. 2020; Zhou et al. 2004). Knowledge and perception of  
8 SARS were significantly associated with precautionary behavior adoption (Varti et al. 2009), but the role of the  
9 public's precautionary behaviors in controlling epidemics such as SARS requires further investigation (Bell 2004).

10  
11  
12  
13 Persons with better self-control possess more positive coping strategies (Li et al. 2016) and sustain more satisfaction  
14 in essential life domains (Duckworth and Seligman 2005; Moffitt et al. 2011). A high level of self-control has a  
15 greater positive association with healthy and virtuous outcomes, and effective adoption of healthy behavior requires  
16 volitional control or willpower (Hoffman et al. 2008). During the days of the COVID-19 pandemic, healthy  
17 behaviors mainly include frequent hand-washing, maintaining cough and sneeze etiquette, keeping social distance  
18 and other steps required to stop its spread. Handwashing culture has been proven to be a vital predictor of the  
19 COVID-19 outbreak magnitude in different countries. Locations where citizens do not have the habit of washing  
20 their hands tend to be more exposed soon after the introduction of this virus (Pogrebna and Kharlamov 2020).

21  
22  
23  
24  
25 Demographic traits can significantly explain human behavior in response to the uprising of a pandemic. Never-  
26 married graduate or undergraduate males in China showed less knowledge of COVID-19, and they went to crowded  
27 places more often and wore masks less often than others during the rapid rise of the disease in mainland China  
28 (Zhong et al. 2020). Males who were less educated and older in age showed poor knowledge, negative attitudes, and  
29 poor preparedness skills for COVID-19 prevention and care (Srichan et al. 2020). Females with a better  
30 understanding of COVID-19 were more likely to adopt preventive measures than others (Kwok et al. 2020). This  
31 result has been supported by another study in which it was found that females with higher education and more  
32 knowledge about COVID-19 displayed more precautionary behaviors than their counterparts. Additionally, people  
33 with a history of chronic physical diseases underperformed precautionary behaviors to prevent themselves from  
34 being infected (Li et al. 2020).

35  
36  
37  
38  
39  
40 Infection in young adults may go undetected for a long period, which makes people less aware of the intensity of the  
41 situation (Dowd et al. 2020) and almost one-third of the Bangladeshi population is aged between 15 and 29 years  
42 (National Institute of Population Research and Training (NIPORT) 2016). The WHO has set six conditions prior to  
43 ending the lockdown. Among those, two conditions are directly related to taking proper preventive measures  
44 (Chapell 2020). As the lockdown cannot go for a long time, the practice of preventive behaviors among this  
45 population requires immense concentration, and performing proper precautionary behaviors is the only difference  
46 between those with the highest and lowest probability of getting COVID-19. The present study aimed to i)  
47 determine the differences, if any, in the adoption of precautionary behaviors among young adults living in the capital  
48 city Dhaka and a nearby district, Tangail, and ii) estimate and compare the predictors of precautionary behavior  
49 adoption among the young adults living in these two districts. Despite having a public university in its center and  
50 being only 83.5 kilometers away from Dhaka, Tangail is considerably behind Dhaka in terms of vital health  
51 indicators and education (Bangladesh Bureau of Statistics (BBS) 2019), similar to all other districts (excluding the  
52 city corporations outside of Dhaka) in Bangladesh. This allows respondents from Tangail to act as a proxy of  
53  
54  
55  
56  
57  
58  
59  
60  
61  
62  
63  
64  
65

1  
2  
3  
4 respondents of other districts, which enables us to understand and compare the dynamics of precautionary behaviors  
5 among young adults living inside and outside of the capital city. To the best of our knowledge, this study is the first  
6 behavioral study of COVID-19 in the Bangladeshi demographic setting.  
7  
8  
9

## 10 **Methods**

### 11 **Design and sampling**

12  
13  
14  
15  
16 The design of this study was cross-sectional in nature. Members of the Secondary and Intermediate Level Students'  
17 Welfare Association (SILSWA) of Dhaka and Tangail were the sampling frames for this study. SILSWA  
18 ([www.silswa.org](http://www.silswa.org)) is one of the largest student platforms in Bangladesh, with almost a million members across the  
19 country. Students from secondary to postgraduate levels are members of this association. This attribute of the  
20 association has made it a good representation of the young adults of the country. A simple random sampling strategy  
21 was adopted, and the sampling form was a questionnaire (Nooh et al. 2020). The minimum sample size was  
22 calculated using the formula  $n = z^2 pq / d^2$ , where  $n$  = the desired sample size,  $z$  = the standard normal deviation (usually  
23 set at 1.96, which corresponds to 95% confidence interval level),  $p$  = the proportion in the target population  
24 estimated to have a particular characteristic (here  $p$  = 67% from the pilot survey),  $q$  =  $1 - p$  (proportion in the target  
25 population not having the particular characteristics) and  $d$  = the degree of accuracy required (usually set at the 0.05  
26 level). Considering all these factors along with design effect = 1, the minimum sample size required for this study  
27 was 340 for each stratum, i.e., district. A list of SILSWA members was collected before the office closures. The  
28 survey participants were selected from the list by using computer-produced random numbers. The background and  
29 aims of the study were stated on the first page of the questionnaire. Declarations of anonymity and data  
30 confidentiality were also explained. Participants 16 (Zhong et al. 2020) up to 29 years of age were included in the  
31 study given their willingness to participate. The final Dhaka and Tangail samples consisted of 350 participants each.  
32  
33  
34  
35  
36  
37  
38  
39  
40

### 41 **Measures**

#### 42 **Knowledge**

43  
44  
45  
46 Participants' knowledge about different features of COVID-19 was measured with a 12-item instrument that was  
47 developed by combining a questionnaire used in a previous study (Zhong et al. 2020) and guidelines for clinical and  
48 community management issued by the IEDCR (2020). Participants were asked to posit whether each statement was  
49 true or false. An additional "I don't know" option was also given in the questionnaire. Specific statements were false  
50 to avoid bias. A binary scoring system was used: "1" for a correct answer and "0" for others (incorrect/unknown).  
51 Therefore, the range of the total knowledge score was from 0 to 12, where the higher the score, the better the  
52 knowledge about COVID-19. The Cronbach's alpha of this instrument was 0.64 for the Dhaka sample and 0.72 for  
53 the Tangail sample, indicating acceptable consistency (Hinton et al. 2014).  
54  
55  
56  
57  
58  
59  
60  
61  
62  
63  
64  
65

## Attitudes

The 2-item instrument to measure attitudes toward COVID-19 was adopted from a previous study (Zhong et al. 2020). In the first question, participants were required to state their agreement on the final control of COVID-19. The scoring system was binary, indicating “1” for choosing the option “Agree” and “0” for other options (“Disagree”/“I don’t know”). In the next question, respondents’ confidence in winning the battle against COVID-19 was measured as a dichotomous outcome (“1” for Yes and “0” for No). The Cronbach’s alpha of this instrument was 0.85 for both the Dhaka sample and the Tangail sample, indicating very good consistency (Hinton et al. 2014).

## Precautionary behaviors

The precautionary behaviors of the participants were measured with 9 items developed by the authors as per the guidelines circulated by the IEDCR (2020). Participants were asked to express their frequency of performing several precautionary behaviors since the COVID-19 outbreak. Responses were collected on a five-point scale ranging from “0=Never” to “4=Very Often”. The total score ranged from 0 to 36. A higher “precautionary score” indicated a better display of precautionary behavior. Cronbach’s alpha was 0.68 for the Dhaka sample and 0.71 for the Tangail sample in this study, meaning acceptable internal consistency (Hinton et al. 2014).

## Self-control

The 13-item Brief Self-Control Scale (Tangney et al. 2004) measured the participants’ self-control on a five-point scale. Among the items, nine were reversed items. The scoring system used for nonreversed items ranged from “1=Not at all” to “5=Very much”. The scores were reversed for reversed items. Better self-control ability was indicated by a higher score (Zhong et al. 2020). The Cronbach’s alpha of this instrument was 0.73 for the Dhaka sample and 0.74 for the Tangail sample, indicating acceptable consistency (Hinton et al. 2014).

## Mental health

Symptoms of common mental health problems were measured with a 12-item General Health Questionnaire (GHQ-12) (Goldberg 1972) since its reliability and validity have already been proven in community settings in different cultural contexts (Lindencrona et al. 2007). In our study, we used a 0-0-1-1 scoring system that generated a score ranging from 0 to 12. A higher score indicated poorer mental health. As a safe benchmark, the mean score was used as a potential threshold (Goldberg et al. 1998). The Cronbach’s alpha of this instrument was 0.74 for both the Dhaka sample and the Tangail sample, indicating good internal consistency (Hinton et al. 2014).

## Demographics

Information on fundamental demographic traits such as sex (male, female), educational qualification (higher secondary, graduate, and postgraduate), and history of chronic/psychological disorder (yes, no) was collected.

## Data analyses and model evaluation

### Descriptive analyses

Descriptive analyses to explore the differences in adoption of precautionary behaviors among different stratified demographic groups in terms of age, education, sex, marital status, mental health, and history of chronic/mental disorder were performed using ANOVA and two-sample t-test, as appropriate.

### Estimation technique

Multivariate analyses were performed using the quantile regression model. Knowledge, attitude, mental health, self-control, and demographic variables acted as independent variables. Classical regression models cannot be extended beyond central locations, and quantile regression can analyze the entire conditional distribution. This appealing property has made quantile regression more popular among economists, econometricians, and biostatisticians (Machado and Mata 2005; Wei et al. 2006). Therefore, the quantile regression model was utilized since this method provides a comprehensive representation of possible causal relationships between variables (Liu and Bottai 2009).

#### *Quantile regression*

The quantile regression approach can characterize the entire conditional response distribution for a given set of predictors. Quantiles are considered a particular location of the distribution. Suppose that  $Z$  is defined by CDF  $F(z)$ ; then, the  $\tau^{\text{th}}$  quantile is the value,  $z_\tau$  such that:

$$P(Z \leq z_\tau) = \tau.$$

Now, the quantile function (QF) can be defined as its inverse:

$$Q_z(\tau) = Q(\tau) = F_z^{-1}(\tau) = \inf \{z: F(z) \geq \tau\}; 0 < \tau < 1$$

If  $F(\cdot)$  is strictly increasing and continuous, then  $F^{-1}(\tau)$  is the unique real number  $z$  such that  $F(z) = \tau$  (Davino et al. 2013; Gilchrist 2000). The empirical distribution function can be written as:

$$F_n(z) = \frac{1}{n} \sum_{i=1}^n I(Z_i \leq z).$$

Then, the  $\tau^{\text{th}}$  sample quantile is defined as:

$$\bar{Q}_z(\tau) = F_n^{-1}(\tau) = \inf\{z: F_n(z) \geq \tau\}.$$

Hao and Naiman (2007) defined quantiles as specific centers of the distribution, minimizing the weighted absolute sum of deviations. Let  $Y$  be a continuous random variable with PDF  $f(y)$ . Hence, the  $\tau^{\text{th}}$  quantile is defined as:

$$q_\tau = \underset{c}{\operatorname{argmin}} E[\rho_\tau(Y - c)],$$



where  $q_\tau(\cdot)$  indicates the following loss function:

$$\begin{aligned}q_\tau(y) &= [\tau - I(y < 0)]y \\ &= [(1 - \tau) I(y < 0) + \tau I(y \geq 0)] |y|\end{aligned}$$

$q_\tau(\cdot)$  is defined as an asymmetric absolute loss function, where  $(1 - \tau)$  is assigned for negative deviations and  $\tau$  is assigned for positive deviations.

Now, the minimization problem of the quantile function becomes:

$$q_\tau = \underset{c}{\operatorname{argmin}} \left\{ (1 - \tau) \int_{-\infty}^c |y - c| f(y) dy + \tau \int_c^{\infty} |y - c| f(y) dy \right\}$$

To minimize expected loss, we differentiated  $E[\rho_\tau(Y - c)]$  regarding  $c$  and then set the derivative equal to zero.

This gives the solution for this minimization problem:

$$\frac{\partial}{\partial c} E[\rho_\tau(Y - c)] = \frac{\partial}{\partial c} \left\{ (1 - \tau) \int_{-\infty}^c (c - y) f(y) dy + \tau \int_c^{\infty} (y - c) f(y) dy \right\}.$$

Leibniz's rule for differentiation is applied under the integral signs in the above equation and becomes:

$$\begin{aligned}\frac{\partial}{\partial c} E[\rho_\tau(Y - c)] &= (1 - \tau) \frac{\partial}{\partial c} \int_{-\infty}^c (c - y) f(y) dy + \tau \int_c^{\infty} \frac{\partial}{\partial c} (y - c) f(y) dy \\ &= F(c)(1 - \tau) + \tau [F(c) - 1] \\ &= F(c) - \tau.\end{aligned}$$

Now, setting a partial derivative equal to zero will lead to the results for the minimum:

$$\begin{aligned}\frac{\partial}{\partial c} E[\rho_\tau(Y - c)] &= 0 \\ F(c) - \tau &= 0 \\ P[Y \leq c] &= P[Y \leq q_\tau] \\ c &= q_\tau.\end{aligned}$$

This solution is unique. Therefore, it can be written as  $c = F^{-1}(\tau)$ . For  $\tau = 0.5$ , we obtain the solution for the median. Now, for any  $0 < \tau < 1$ , it can be said that the  $\tau^{\text{th}}$  sample quantile is the value of  $c$  that minimizes the sample expected loss function.

Let response variable  $y$  be associated with a set of explanatory variables  $x$ . Now, the concept of the unconditional mean can be extended to the conditional mean function estimation:

$$\hat{\mu}(x_i, \beta) = \underset{\mu}{\operatorname{argmin}} E[Y - \mu(x_i, \beta)]^2,$$

where,  $\mu(x_i, \beta) = E[Y|X = x_i]$  is termed as a conditional mean function. The conditional mean function of  $y$  given  $x$  is assumed linear. Therefore, a linear mean function can be written as,  $\mu(x_i, \beta) = x_i' \beta$ . An ordinary least square solution can be defined as:

$$\hat{\beta} = \underset{\beta}{\operatorname{argmin}} E[Y - x_i' \beta]^2,$$

and now the  $\tau^{\text{th}}$  sample quantile can be explained. Davino and his colleagues (2013) defined the  $\tau^{\text{th}}$  conditional quantile function as:

$$\hat{q}_Y(\tau, X) = \underset{Q_Y(\tau, X)}{\operatorname{argmin}} E[\rho_\tau(Y - Q_Y(\tau|X))],$$

where,  $Q_Y(\tau|X)$  is defined as the conditional quantile function. In case of a linear quantile function,  $Q_Y(\tau|X) = x_i' \beta^{(\tau)}$ . Here  $\beta^{(\tau)}$  can be obtained by solving following equation:

$$\beta^{(\tau)} = \underset{\beta}{\operatorname{argmin}} E[\rho_\tau(Y - X\beta)].$$

Suppose that random samples are drawn independently from a population and the resulting data structure is expressed as  $(x_i', y_i)$ ; ( $i = 1, 2, \dots, n$ ). Here,  $y_i$  is a response variable (scalar) with a common CDF  $F(y)$ , and  $y_i$  is the  $p \times 1$  vector of a design matrix  $X$ . Now, the  $\tau^{\text{th}}$  linear conditional quantile can be modeled as:

$$Q_{y_i}(\tau|x_i) = x_i' \beta^{(\tau)}, \quad i = 1, 2, \dots, n.$$

Here,  $Q_{y_i}(\cdot) \equiv F_{y_i}^{-1}(\cdot)$  and  $\beta^{(\tau)}$  is a column vector of length  $p$  with unknown fixed parameters. Now, the following minimization problem can be used to estimate  $\beta^{(\tau)}$ :

$$\begin{aligned} \widehat{\beta}^{(\tau)} &= \operatorname{argmin}_{\beta^{(\tau)} \in \mathbb{R}^p} \left\{ \sum_{i \in (i: y_i \geq x_i' \beta^{(\tau)})} \tau(y_i - x_i' \beta^{(\tau)}) \right. \\ &\quad \left. + \sum_{i \in (i: y_i < x_i' \beta^{(\tau)})} (\tau - 1)(y_i - x_i' \beta^{(\tau)}) \right\} \\ &= \operatorname{argmin}_{\beta^{(\tau)} \in \mathbb{R}^p} \sum_{i=1}^n \rho_{\tau}(y_i - x_i' \beta^{(\tau)}) \end{aligned}$$

The above equation can be expressed in terms of a linear function subject to linear constraints. Thus, linear programming can be used to find  $\beta^{(\tau)}$  (Koenker 1978). Here, parameter  $\beta^{(\tau)}$  and its estimator  $\widehat{\beta}^{(\tau)}$  are both depend on  $\tau \in (0, 1)$ .

## Results

The descriptive statistics of the mean precautionary score of the respondents of Dhaka obtained under different covariates are given in Table 1.

Table 1 Sample distribution of Dhaka participants and mean adoption of precautionary behavior by demographic factors

|                                   | Characteristics  | Sample    | Adoption of precautionary behaviors | p-value |
|-----------------------------------|------------------|-----------|-------------------------------------|---------|
|                                   |                  | % (n)     | mean                                |         |
| <b>Sex</b>                        | <b>Total</b>     | 100 (350) | 24.4                                |         |
|                                   | Female           | 49% (170) | 24.3                                | 0.61    |
|                                   | Male             | 51% (180) | 24.5                                |         |
| <b>Education</b>                  | Higher secondary | 30% (105) | 23.7                                | 0.008   |
|                                   | Graduate         | 58% (202) | 24.4                                |         |
|                                   | Postgraduate     | 12% (43)  | 26.2                                |         |
| <b>Psychologically distressed</b> | Not distressed   | 55% (194) | 25.1                                | 0.001   |
|                                   | Distressed       | 45% (156) | 23.6                                |         |

| <b>History of psychological disorder</b> |         |           |      |       |
|------------------------------------------|---------|-----------|------|-------|
|                                          | Absent  | 86% (301) | 24.5 | 0.779 |
|                                          | Present | 14% (49)  | 24.3 |       |

To examine whether the mean precautionary score changed with the level of covariates, a two-sample t-test and analysis of variance (ANOVA) were conducted. In the resident of Dhaka, all covariates except sex and history of psychological disorder were found to have a significant association with precautionary score. The mean score varied significantly ( $p=0.008$ ) with the level of education among the respondents of Dhaka. It was found that the mean precautionary score was highest (26.2) for the people who had completed their postgraduate education, whereas this mean score was 24.4 for those that completed the graduate level. The mean precautionary score was lowest (23.7) for those who had only a Higher Secondary Certificate (HSC) degree. Psychologically distressed people had lower mean (23.6) precautionary scores than those who were not distressed (mean=25.1). This result was found to be statistically significant at the 1% level of significance.

Table 2 Sample distribution of the Tangail participants and mean adoption of precautionary behaviors by demographic factors

|                                          | <b>Characteristics</b> | <b>Sample</b> | <b>Adoption of precautionary behaviors</b> | <b>p-value</b> |
|------------------------------------------|------------------------|---------------|--------------------------------------------|----------------|
|                                          |                        |               | mean                                       |                |
|                                          | Total                  | 100 (350)     | 24.5                                       |                |
| <b>Sex</b>                               | Female                 | 47% (166)     | 25.3                                       | 0.007          |
|                                          | Male                   | 53% (184)     | 23.8                                       |                |
| <b>Education</b>                         | Higher secondary       | 32% (113)     | 24.7                                       | 0.524          |
|                                          | Graduate               | 58% (203)     | 24.3                                       |                |
|                                          | Postgraduate           | 10% (34)      | 25.4                                       |                |
| <b>Psychologically distressed</b>        | Not distressed         | 58% (202)     | 25.1                                       | 0.019          |
|                                          | Distressed             | 42% (148)     | 23.7                                       |                |
| <b>History of psychological disorder</b> | Absent                 | 85% (296)     | 24.7                                       | 0.29           |
|                                          | Present                | 15% (54)      | 23.7                                       |                |

\*\* $p<0.05$

\*\*\* $p<0.01$

Table 2 shows that all covariates except educational level and history of psychological disorder were found to have a significant association with precautionary score among the resident of Tangail. The mean precautionary score of the young adults of Tangail differed significantly ( $p=0.007$ ) by sex. Females (mean=25.3) proved to be more cautious than males (mean=23.8). Psychologically distressed participants had lower mean precautionary scores (23.7) than those who were not psychologically distressed (mean=25.1).

Table 3 Differences in precautionary behaviors among people at the district level

| District     | Sample<br>% (n)  | Adoption of precautionary behaviors | p-value      |
|--------------|------------------|-------------------------------------|--------------|
|              |                  | mean                                |              |
| Dhaka        | 50% (350)        | 24.4                                | <b>0.769</b> |
| Tangail      | 50% (350)        | 24.5                                |              |
| <b>Total</b> | <b>100 (700)</b> | <b>24.48</b>                        |              |

Table 3 shows that the mean precautionary score (24.4) of participants who were living Dhaka insignificantly differed from the mean precautionary score (24.5) of those who were living in Tangail.

Before fitting the regression model using the precautionary score as the dependent variable, it was essential to check whether the precautionary score data contained outliers. A box plot of the precautionary score is given in Fig. 1, and it is depicted from the figure that some observations of the precautionary score were detected as outliers for the sample of Dhaka, Tangail and the combined sample. Moreover, the skewness of the precautionary score was found to be -0.53, -0.82 and -0.71, indicating that the three distributions of the precautionary score were negatively skewed. Therefore, a linear regression model was not appropriate to examine the effects of covariates on the precautionary score for this scenario.

[Fig.1 and Fig.2 about here]

Thus, to determine the adjusted contribution of the related variables on the precautionary score of people, a quantile regression model was fitted on the fiftieth quantile. From Fig. 2, it is evident that the value of the mean absolute error of our predicted values is lowest at the fiftieth quantile. Therefore, the median quantile regression model performs better in these scenarios to predict the precautionary score. Regression coefficients, standard errors, and p values are reported in Table 4. Model 1 is pertinent for the samples drawn from Dhaka; Model 2 is for the sample drawn from Tangail. Model 3 is the full sample quantile regression model combining samples from both districts in a single model.

Table 4 Quantile regression model for precautionary behavior adoption

| Variables | Model 1 (Dhaka sample) |           | Model 2 (Tangail sample) |           | Model 3 (Full sample) |           |
|-----------|------------------------|-----------|--------------------------|-----------|-----------------------|-----------|
|           | Coefficient (SE)       | p-value   | Coefficient (SE)         | p-value   | Coefficient (SE)      | p-value   |
| Intercept | 16.4 (2.02)            | <0.001*** | 11.89 (1.95)             | <0.001*** | 14.4 (1.22)           | <0.001*** |
| Knowledge | 0.19 (0.15)            | 0.23      | 0.12 (0.12)              | 0.316     | 0.08 (0.08)           | 0.333     |
| Attitude  | 0.0 (0.24)             | 1.0       | 0.08 (0.31)              | 0.786     | 0.15 (0.18)           | 0.392     |

|                                                   |              |           |              |           |              |           |
|---------------------------------------------------|--------------|-----------|--------------|-----------|--------------|-----------|
| Self-control                                      | 0.14 (0.02)  | <0.001*** | 0.26 (0.03)  | <0.001*** | 0.2 (0.02)   | <0.001*** |
| Psychological distress                            | -0.9 (0.49)  | 0.065*    | -0.25 (0.5)  | 0.61      | -0.32 (0.33) | 0.336     |
| <b>Sex (Ref: Male)</b>                            | -            | -         | -            | -         | -            | -         |
| Female                                            | 0.04 (0.48)  | 0.921     | -0.6 (0.48)  | 0.212     | -0.06 (0.33) | 0.858     |
| <b>Education (Ref: Higher secondary)</b>          | -            | -         | -            | -         | -            | -         |
| Graduate                                          | 0.85 (0.55)  | 0.119     | 0.28 (0.55)  | 0.604     | 0.63 (0.4)   | 0.117     |
| Postgraduate                                      | 2.42 (0.57)  | <0.001*** | 1.41 (0.96)  | 0.142     | 2.3 (0.53)   | <0.001*** |
| History of psychological disorder/chronic disease | -0.47 (0.66) | 0.474     | -0.26 (0.74) | 0.724     | -0.01 (0.41) | 0.978     |
| <b>District (Ref: Dhaka)</b>                      |              |           |              |           |              |           |
| Tangail                                           | -            | -         | -            | -         | 0.02 (0.3)   | 0.939     |

SE= standard error

\*p<0.1

\*\*\*p<0.01

As shown in Table 4, the self-control score was found to have a significant positive association with the precautionary score at the fiftieth quantile point in all three models [coefficient=0.14, 0.26, 0.2, respectively]. Postgraduate participants were estimated to be more cautious compared to their counterparts in model 1 and model 3 [coefficient=2.42, p<0.001; coefficient=2.30, p<0.001, respectively]. The precautionary score for psychologically distressed people was significantly lower [at the 10% level of significance; coefficient=-0.9, p=0.065] than the score for those who were not distressed in model 1. In summary, it can be concluded from the models that postgraduate participants with higher self-control and better mental health had developed better precautionary behaviors to prevent COVID-19.

## Discussion

The world right is now battling against an unforeseeable and unseen enemy because COVID-19 is highly transmissible even when the symptoms are absent (Bai et al. 2020; Li et al. 2020). The Secretary General of the United Nations has claimed this pandemic to be the most challenging event after the Second World War (PTI 2020). Circulating effective, sufficient, essential, updated, and accurate information regarding COVID-19 prevention and control has emerged as a major public health concern, and stopping this COVID-19 pandemic requires the utmost effort from every stakeholder along with frontline fighters and public health professionals (Srichan et al. 2020).

The United Nations Children's Fund (UNICEF) has urged communities to take necessary protective actions and to support the control efforts so that this pandemic can be minimized (UNICEF 2020). In Beijing, the majority of the patients were young adults (Tian et al. 2020). South Korea experienced a low fatality rate amid a large outbreak of COVID-19 because the concentration of contamination was the highest among the young adults (Dowd et al. 2020).

1  
2  
3  
4 Given this context, the primary goal of this research was to investigate which factors shape precautionary behaviors  
5 across different groups of young adults living in Dhaka and Tangail, Bangladesh. People with good mental health,  
6 i.e., less psychological distress, tended to adopt more preventive measures in the studied areas. The tendency of  
7 being less concerned about maintaining a healthy lifestyle among psychologically distressed persons is nothing new  
8 (Honda et al. 2005). Postgraduate participants in Dhaka reported the adoption of more precautions than the other  
9 participants. Female participants in Tangail with a better mental state were more cautious than males, which  
10 supports previous findings that men are more expected to exhibit risk-taking behavioral patterns (Duell et al. 2018;  
11 Pawlowski et al. 2008).

12  
13  
14  
15  
16 Among the variables selected for modeling, self-control was significantly associated with the adoption of  
17 precautionary behaviors in all three models. Education had a significant positive relationship with precautionary  
18 behavior in two models, and mental health became a significant predictor in one model. Knowledge, attitude, sex,  
19 and history of psychological disorder/chronic disease were not found to be effective predictors of precautionary  
20 behaviors.  
21  
22

23  
24 Good knowledge about the high infectivity of COVID-19 makes people take a high level of precautions to prevent  
25 themselves from being contaminated (Zhong et al. 2020). Similarly, Li et al. (2020) found that knowledge of the  
26 participants regarding COVID-19 was positively related to their precautionary behavior adoption. Presumably,  
27 citizens of Dhaka have similarities in the magnitude of their access to information. Since knowledge is gained  
28 through information, invariance of knowledge among citizens made knowledge an insignificant predictor of  
29 precautionary behaviors. On the other hand, residents of Tangail might not have an equal opportunity to access the  
30 information or acquire knowledge from various sources. It was assumed that a person with more knowledge of  
31 COVID-19 may realize the importance of protective measures against this pandemic and do so accordingly in  
32 Tangail. Astoundingly, this relationship did not hold. Knowledge was not a factor that influences the adoption of  
33 precautionary behaviors in the studied areas.  
34  
35

36  
37  
38  
39 Self-control refers to a person's ability to change or dominate inner responses and to disrupt undesired behavioral  
40 tendencies (Tangney et al. 2004). Good self-control is obviously relevant to health outcomes, particularly in  
41 situations where the ability to restrain or initiate action is significantly related to the ability to handle difficulties  
42 arising from problematic situations (Li et al. 2020; Wills et al. 2008). This concept is reflected clearly in this study,  
43 as self-control was observed to be a significant predictor of precautionary behaviors in young adults in Dhaka and  
44 Tangail. Self-control positively induces a person to do what is right for him. Keeping a social distance, using  
45 protective equipment appropriately, maintaining cough etiquette, and quarantining oneself even if minimal  
46 symptoms are present are similar to fighting a war during this pandemic era. A proper precautionary step taken by  
47 one person can save the lives of many. A person with better self-control is, therefore, a better fighter against  
48 COVID-19 since he is more likely to adopt precautionary behaviors. In many cases, a higher level of education was  
49 associated with a higher level of precautionary behavior. A postgraduate person seemingly possesses better  
50 knowledge and understanding of what to do in this sort of never-seen situation, which is why it was well anticipated  
51 that a postgraduate resident of Bangladesh would be more precautionary than others.  
52  
53  
54  
55  
56  
57  
58  
59  
60  
61  
62  
63  
64  
65

1  
2  
3  
4 It is evident that the perceived personal risk of infection and health effects can predict individuals' engagement in  
5 protective behavior (Bish and Michie 2010). A very recent study identified a subgroup that was less engaged in  
6 protective behavior. This cohort consisted of people with disengagement in information-seeking who thought the  
7 situation was less risky than others thought; the members of this cohort thought they would not be affected by  
8 COVID-19 (Wise et al. 2020). These characteristics indicate that less informed individuals misperceive the intensity  
9 of the situation. Moreover, these individuals either do not realize the danger of the situation or mistakenly consider  
10 themselves immunized against the danger. Maintaining a proper attitude toward emergency situations is therefore  
11 very necessary. An optimistic attitude toward disease can result in the success of control measures such as traffic  
12 limits and location lockdowns (Zhong et al. 2020). During the SARS outbreak, optimistic thinkers more often  
13 avoided crowded or public places but portrayed poor adoption of health behaviors, such as less use of disinfectants  
14 and washing their hands infrequently. On the other hand, those who were more concerned about SARS reported  
15 better adoption of health behaviors and less avoidance (Lee-Baggley et al. 2004). Surprisingly, attitude did not  
16 appear to be a significant predictor of precautionary behavior in any of the samples in this study.

17  
18  
19  
20  
21  
22  
23  
24 Participants from Dhaka and Tangail, in general, showed moderate precautionary behavior during the rising period  
25 of COVID-19 in Bangladesh.

26  
27 Raising awareness by penetrating actual, effective, and timely information regarding COVID-19 to the leaders  
28 among its citizens can be one of the short-term focuses of the Bangladeshi government. The circulation of false  
29 information, rumors, and unauthentic news from different social networking sites and online news portals obviously  
30 misguides people and, in effect, promotes the loss of self-control. These factors can result in unanticipated fatal  
31 outcomes. Publicizing scientific information about COVID-19 as thoroughly as possible can enhance the  
32 development of the public's healthy behaviors (Zhong et al. 2020). Appropriate filtration of information, exclusion  
33 of rumors, and meticulous penetration and filtration of information into the public's cognition are all needed in  
34 Bangladesh before lifting the lockdown up. As containing better knowledge and a proper attitude cannot ensure the  
35 adoption of more precautionary behaviors among the people, the government's strong intervention to keep people at  
36 home and distant from each other while continuing the lockdown for several more days may be the immediate  
37 solution. At the same time, the economic burden on the lower-income residents should be addressed so that people  
38 do not have to suffer starvation due to the shutdown of economic activities.

## 46 47 **Limitations**

48  
49  
50 Even though the findings of this early study can bear several implications, both theoretically and empirically, it  
51 could not overcome some limitations. The study covered only educated young adult participants and could not  
52 incorporate the responses from elderly people living in remote areas. Rural people and older people are more likely  
53 to have inappropriate precautionary behaviors, and they need special research efforts. Analyses of a more  
54 representative sample drawn from all over Bangladesh can show more vigorous findings.  
55  
56  
57  
58  
59  
60  
61  
62  
63  
64  
65



## Compliance with ethical standards

**Conflict of interest** The authors declare that they do not have any conflict of interest.

**Funding** No funding was received for this study.

## References

A.B.C. (2020) In: ABC News. <https://abcnews.go.com/International/wireStory/soldiers-enforce-10-day-shutdown-bangladesh-slow-virus-69813017>. Accessed 9 May 2020

Ajilore K, Atakiti I, Onyenankeya K (2017) College students' knowledge, attitudes and adherence to public service announcements on Ebola in Nigeria: Suggestions for improving future Ebola prevention education programmes. *Health Education Journal* 76:648–660. doi:10.1177/0017896917710969

Almutairi KM, Al Helih EM, Moussa M et al (2015) Awareness, attitudes, and practices related to coronavirus pandemic among public in Saudi Arabia. *Family & community health* 38:332-340

Bai Y, Yao L, Wei T et al (2020) Presumed Asymptomatic Carrier Transmission of COVID-19. *Jama*. doi:10.1001/jama.2020.2565

BBS (2019) Bangladesh Sample Vital Statistics 2018. Dhaka: Bangladesh Bureau of Statistics. Available from: <http://www.bbs.gov.bd/site/page/ef4d6756-2685-485a-b707-aa2d96bd4c6c/->

Bell DM (2004) Public Health Interventions and SARS Spread, 2003. *Emerging Infectious Diseases* 10:1900–1906. doi:10.3201/eid1011.040729

Bish A, Michie S (2010) Demographic and attitudinal determinants of protective behaviours during a pandemic: a review. *British journal of health psychology* 15:797-824

Chappell B (2020) WHO Sets 6 Conditions For Ending A Coronavirus Lockdown. In: NPR. <https://www.npr.org/sections/goatsandsoda/2020/04/15/834021103/who-sets-6-conditions-for-ending-a-coronavirus-lockdown>. Accessed 9 May 2020

Chen N, Zhou M, Dong X et al (2020) Epidemiological and clinical characteristics of 99 cases of 2019 novel coronavirus pneumonia in Wuhan, China: a descriptive study. *The Lancet* 395:507–513. doi:10.1016/s0140-6736(20)30211-7

1  
2  
3  
4  
5  
6 Daily Star (2020) Coronavirus outbreak: Govt orders closure of public, private offices from March 26 to April 4. In:  
7 The Daily Star. [https://www.thedailystar.net/coronavirus-deadly-new-threat/news/govt-offices-closed-march-26-](https://www.thedailystar.net/coronavirus-deadly-new-threat/news/govt-offices-closed-march-26-april-4-cabinet-secretary-1884730)  
8 [april-4-cabinet-secretary-1884730](https://www.thedailystar.net/coronavirus-deadly-new-threat/news/govt-offices-closed-march-26-april-4-cabinet-secretary-1884730). Accessed 9 May 2020  
9

10  
11 Davino C, Furno M, Vistocco D (2013) Quantile regression: theory and applications. John Wiley & Sons  
12  
13 Dowd JB, Rotondi V, Adriano L, Brazel DM, Block P, Ding X et al (2020) Demographic science aids in  
14 understanding the spread and fatality rates of COVID-19. medRxiv  
15

16  
17  
18 Duckworth AL, & Seligman, ME (2005) Self-discipline outdoes IQ in predicting academic performance of  
19 adolescents. Psychological science 16:939-944. doi:10.1111/j.14679280.2005.01641.x  
20

21  
22 Duell N, Steinberg L, Icenogle G et al (2018) Age patterns in risk taking across the world. Journal of youth and  
23 adolescence 47:1052-1072.  
24

25  
26  
27 Gates B (2020) Responding to Covid-19 — A Once-in-a-Century Pandemic? New England Journal of Medicine  
28 382:1677–1679. doi: 10.1056/nejmp2003762  
29

30  
31 Gilchrist W (2000) Statistical modelling with quantile functions. CRC Press.  
32

33  
34 Goldberg DP (1972) The detection of psychiatric illness by questionnaire. Maudsley monograph, 21  
35

36  
37 Goldberg DP, Oldehinkel T, Ormel J (1998) Why GHQ threshold varies from one place to another. Psychological  
38 medicine 28:915-921  
39

40  
41  
42 Hao L, Naiman DQ (2007) Quantitative applications in the social sciences  
43

44  
45 Haushofer J, Metcalf JCE (2020) Combining behavioral economics and infectious disease epidemiology to mitigate  
46 the COVID-19 outbreak. Princeton University.  
47

48  
49 Hinton PR, McMurray I, Brownlow C (2014) SPSS explained. Routledge, Taylor & Francis Group, London  
50

51  
52 Hofmann W, Friese M, Wiers, RW (2008) Impulsive versus reflective influences on health behavior: A theoretical  
53 framework and empirical review. Health Psychology Review 2:111-137. doi: 10.1080/17437190802617668  
54

55  
56  
57 Honda K, Goodwin RD, Neugut AI (2005) The associations between psychological distress and cancer prevention  
58 practices. Cancer Detection and Prevention 29:25–36. doi:10.1016/j.cdp.2004.08.004  
59  
60  
61  
62  
63  
64  
65

1  
2  
3  
4  
5  
6 Huang C, Wang Y, Li X et al (2020) Clinical features of patients infected with 2019 novel coronavirus in Wuhan,  
7 China. *The Lancet* 395:497-506. DOI: 10.1016/S0146736 (20) 30183-5  
8  
9

10 IEDCR (2020)In: করোনা ইনফো. <https://corona.gov.bd/>. Accessed 9 May 2020  
11  
12

13 Koenker R, Bassett JG (1978) Regression quantiles. *Econometrica: journal of the Econometric Society* 46:33-50.  
14  
15

16 Kwok KO, Li KK, Chan HH, et al. (2020) Community responses during the early phase of the COVID-19 epidemic  
17 in Hong Kong: risk perception, information exposure and preventive measures. *medRxiv*  
18

19 Lee-Baggley D, DeLongis A, Voorhoeave P, Greenglass E (2004) Coping with the threat of severe acute respiratory  
20 syndrome: Role of threat appraisals and coping responses in health behaviors. *Asian Journal of Social*  
21 *Psychology* 7:9-23  
22  
23  
24  
25

26 Li JB, Delvecchio E, Lis A, Nie YG, Di Riso D (2016) Positive coping as mediator between self-control and life  
27 satisfaction: Evidence from two Chinese samples. *Personality and Individual Differences* 97:130-133.  
28 doi:10.1016/j.paid.2016.03.042  
29  
30  
31

32 Li JB, Yang A, Dou K, Cheung RY (2020) Self-control moderates the association between perceived severity of the  
33 coronavirus disease 2019 (COVID-19) and mental health problems among the Chinese public  
34  
35

36 Li JB, Yang A, Dou K et al (2020). Chinese public's knowledge, perceived severity, and perceived controllability of  
37 the COVID-19 and their associations with emotional and behavioural reactions, social participation, and  
38 precautionary behaviour: A national survey  
39  
40  
41

42 Li R, Pei S, Chen B et al (2020) Substantial undocumented infection facilitates the rapid dissemination of novel  
43 coronavirus (SARS-CoV2). *Science*. doi:10.1126/science.abb3221  
44  
45  
46

47 Lindencrona F, Ekblad S, Hauff E (2008) Mental health of recently resettled refugees from the Middle East in  
48 Sweden: the impact of pre-resettlement trauma, resettlement stress and capacity to handle stress. *Social psychiatry*  
49 *and psychiatric epidemiology* 43: 121-131. [doi:10.1007/s00127-007-0280-2](https://doi.org/10.1007/s00127-007-0280-2)  
50  
51  
52

53 Liu Y, Bottai M (2009) Mixed-Effects Models for Conditional Quantiles with Longitudinal Data. *The International*  
54 *Journal of Biostatistics* 5. doi:10.2202/1557-4679.1186  
55  
56

57 Liu Z, Gao H, Zhang S (2004) Prevention and treatment knowledge towards SARS of urban population in  
58 Jinan. *Preventive Medicine Tribune* 10:659–660  
59  
60  
61  
62  
63  
64  
65

1  
2  
3  
4  
5  
6 Machado JA, Mata J (2005) Counterfactual decomposition of changes in wage distributions using quantile  
7 regression. *Journal of applied Econometrics* 20:445-465. doi:10.1002/jae.788  
8

9  
10 Moffitt TE, Arseneault L, Belsky D, Dickson N et al (2011) A gradient of childhood self-control predicts health,  
11 wealth, and public safety. *Proceedings of the national Academy of Sciences* 108:2693-2698.  
12 doi:10.1073/pnas.1010076108  
13

14  
15  
16 NIPORT (2016) Bangladesh Demographic and Health Survey 2014. Dhaka: National Institute of Population  
17 Research and Training (NIPORT)  
18

19  
20  
21 Nooh HZ, Alshammary RH, Alenezzy JM et al (2020) Public awareness of coronavirus in Al-Jouf region, Saudi  
22 Arabia. *Journal of Public Health*. doi:10.1007/s10389-020-01209-y  
23

24 Paul R (2020) Bangladesh confirms its first three cases of coronavirus. In: Reuters.  
25 <https://www.reuters.com/article/us-health-coronavirus-bangladesh-idUSKBN20V0FS>. Accessed 9 May 2020  
26

27  
28 Pawlowski B, Atwal R, Dunbar R (2008) Sex Differences in Everyday Risk-Taking Behavior in  
29 Humans. *Evolutionary Psychology* 6:147470490800600. doi:10.1177/147470490800600104  
30

31  
32  
33 Person B, Sy F, Holton K et al (2004) Fear and Stigma: The Epidemic within the SARS Outbreak. *Emerging*  
34 *Infectious Diseases* 10:358–363. doi:10.3201/eid1002.030750  
35

36  
37 Pogrebna G, Kharlamov A (2020). The Impact of Cross-Cultural Differences in Handwashing Patterns on the  
38 COVID-19 Outbreak Magnitude. *Medrxiv*  
39

40  
41  
42 Pti (2020) COVID-19 pandemic most challenging crisis since Second World War: UN chief. In: *The Economic*  
43 *Times*. [https://economictimes.indiatimes.com/news/international/world-news/covid-19-pandemic-most-challenging-](https://economictimes.indiatimes.com/news/international/world-news/covid-19-pandemic-most-challenging-crisis-since-second-world-war-un-chief/articleshow/74923642.cms)  
44 [crisis-since-second-world-war-un chief/articleshow/74923642.cms](https://economictimes.indiatimes.com/news/international/world-news/covid-19-pandemic-most-challenging-crisis-since-second-world-war-un-chief/articleshow/74923642.cms). Accessed 9 May 2020  
45

46  
47  
48 Reuters (2020) Bangladesh reports first coronavirus death -officials. In: Reuters.  
49 <https://www.reuters.com/article/health-coronavirus-bangladesh-idUSL4N2BB384>. Accessed 9 May 2020  
50

51  
52  
53 Srichan P, Apidechkul T, Tamornpark R et al (2020) Knowledge, Attitude and Preparedness to Respond to the 2019  
54 Novel Coronavirus (COVID-19) Among the Bordered Population of Northern Thailand in the Early Period of the  
55 Outbreak: A Cross-Sectional Study. Available at SSRN 3546046  
56  
57  
58  
59  
60  
61  
62  
63  
64  
65

1  
2  
3  
4 Tachfouti N, Slama K, Berraho M, Nejari C (2012) The impact of knowledge and attitudes on adherence to  
5 tuberculosis treatment: a case-control study in a Moroccan region. *Pan African Medical Journal* 12(52)  
6

7  
8 Tangney JP, Baumeister RF, Boone AL (2004). High Self-Control Predicts Good Adjustment, Less Pathology,  
9 Better Grades, and Interpersonal Success. *Journal of Personality* 72:271–324. doi:10.1111/j.0022-  
10 3506.2004.00263.x  
11  
12

13  
14  
15 Tao N (2003) An analysis on reasons of SARS-induced psychological panic among students. *Journal of Anhui*  
16 *Institute of Education* 21:78–79  
17

18  
19 Tian S, Hu N, Lou J et al (2020) Characteristics of COVID-19 infection in Beijing. *Journal of Infection*  
20

21  
22 UNICEF (2020) Interim guidance for COVID-19 prevention and control in schools. In: UNICEF.  
23 [https://www.unicef.org/reports/key-messages-and-actions-coronavirus-disease-covid-19-prevention-and-control-](https://www.unicef.org/reports/key-messages-and-actions-coronavirus-disease-covid-19-prevention-and-control-schools)  
24 [schools](https://www.unicef.org/reports/key-messages-and-actions-coronavirus-disease-covid-19-prevention-and-control-schools). Accessed 9 May 2020  
25

26  
27 Vartti AM, Oenema A, Schreck M et al (2009) SARS Knowledge, Perceptions, and Behaviors: a Comparison  
28 between Finns and the Dutch during the SARS Outbreak in 2003. *International Journal of Behavioral Medicine*  
29 16:41–48. doi:10.1007/s12529-008-9004-6  
30

31  
32  
33 Wei Y, Pere A, Koenker R, He X (2006) Quantile regression methods for reference growth charts. *Statistics in*  
34 *Medicine* 25:1369–1382. doi:10.1002/sim.2271  
35

36  
37 WHO (2020) 2019-nCoV outbreak is an emergency of international concern. In: World Health Organization.  
38 [http://www.euro.who.int/en/health-topics/emergencies/pages/news/news/2020/01/2019-ncov-outbreak-is-an-](http://www.euro.who.int/en/health-topics/emergencies/pages/news/news/2020/01/2019-ncov-outbreak-is-an-emergency-of-international-concern)  
39 [emergency-of-international-concern](http://www.euro.who.int/en/health-topics/emergencies/pages/news/news/2020/01/2019-ncov-outbreak-is-an-emergency-of-international-concern). Accessed 9 May 2020  
40  
41

42  
43  
44 WHO (2020) Coronavirus disease 2019 (COVID-19): situation report-25, 14 February 2020.  
45 <https://www.who.int/docs/defaultsource/coronaviruse/situation-reports/20200214-sitrep-25-covid-19.pdf>  
46

47 WHO (2020) Coronavirus. In: World Health Organization. [https://www.who.int/emergencies/diseases/novel-](https://www.who.int/emergencies/diseases/novel-coronavirus-2019)  
48 [coronavirus-2019](https://www.who.int/emergencies/diseases/novel-coronavirus-2019). Accessed 9 May 2020  
49

50  
51 Wills TA, Ainette MG, Stoolmiller M, Gibbons FX, Shinar O (2008) Good self-control as a buffering agent for  
52 adolescent substance use: An investigation in early adolescence with time-varying covariates. *Psychology of*  
53 *Addictive Behaviors* 22:459-471. doi:10.1037/a0012965  
54  
55

56  
57 Wise T, Zbozinek TD, Michelini G, Hagan CC (2020) Changes in risk perception and protective behavior during the  
58 first week of the COVID-19 pandemic in the United States. <https://doi.org/10.31234/osf.io/dz428>  
59  
60  
61  
62  
63  
64  
65

1  
2  
3  
4  
5  
6  
7  
8  
9  
10  
11  
12  
13  
14  
15  
16  
17  
18  
19  
20  
21  
22  
23  
24  
25  
26  
27  
28  
29  
30  
31  
32  
33  
34  
35  
36  
37  
38  
39  
40  
41  
42  
43  
44  
45  
46  
47  
48  
49  
50  
51  
52  
53  
54  
55  
56  
57  
58  
59  
60  
61  
62  
63  
64  
65

Zhong B-L, Luo W, Li H-M et al (2020) Knowledge, attitudes, and practices towards COVID-19 among Chinese residents during the rapid rise period of the COVID-19 outbreak: a quick online cross-sectional survey. *International Journal of Biological Sciences* 16:1745–1752. doi:10.7150/ijbs.45221

Zhou X, Xiu C, Chu Q (2004) Prevention and treatment knowledge and attitudes towards SARS of urban residents in Qingdao. *Preventive Medicine Tribune* 10:407–408

**List of figures:**

**Figure 1**      Boxplot for precautionary score

**Figure 2**      Mean absolute error (MAE) at different quantiles

**Figure 1**      **Boxplot for precautionary score<sup>a</sup>**

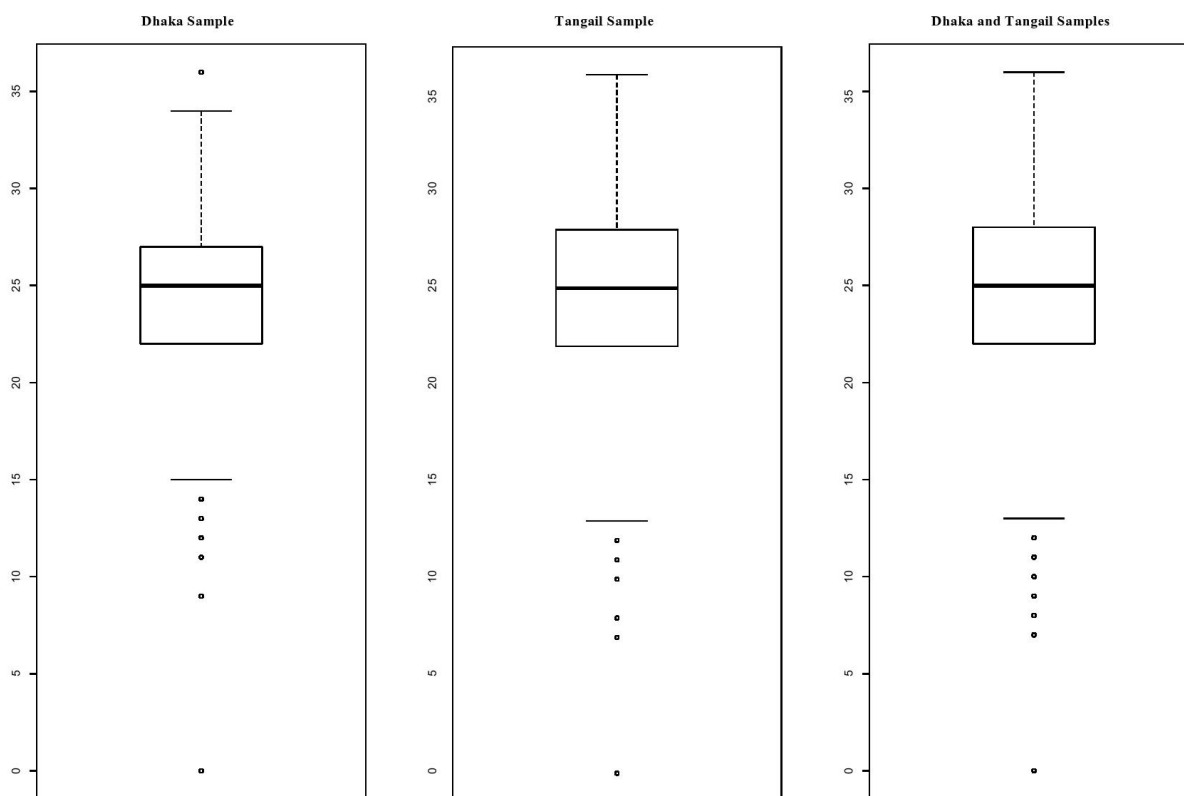

<sup>a</sup> y-axis of each plot demonstrated precautionary scores



**Figure 2 Mean absolute error (MAE) at different quantiles**

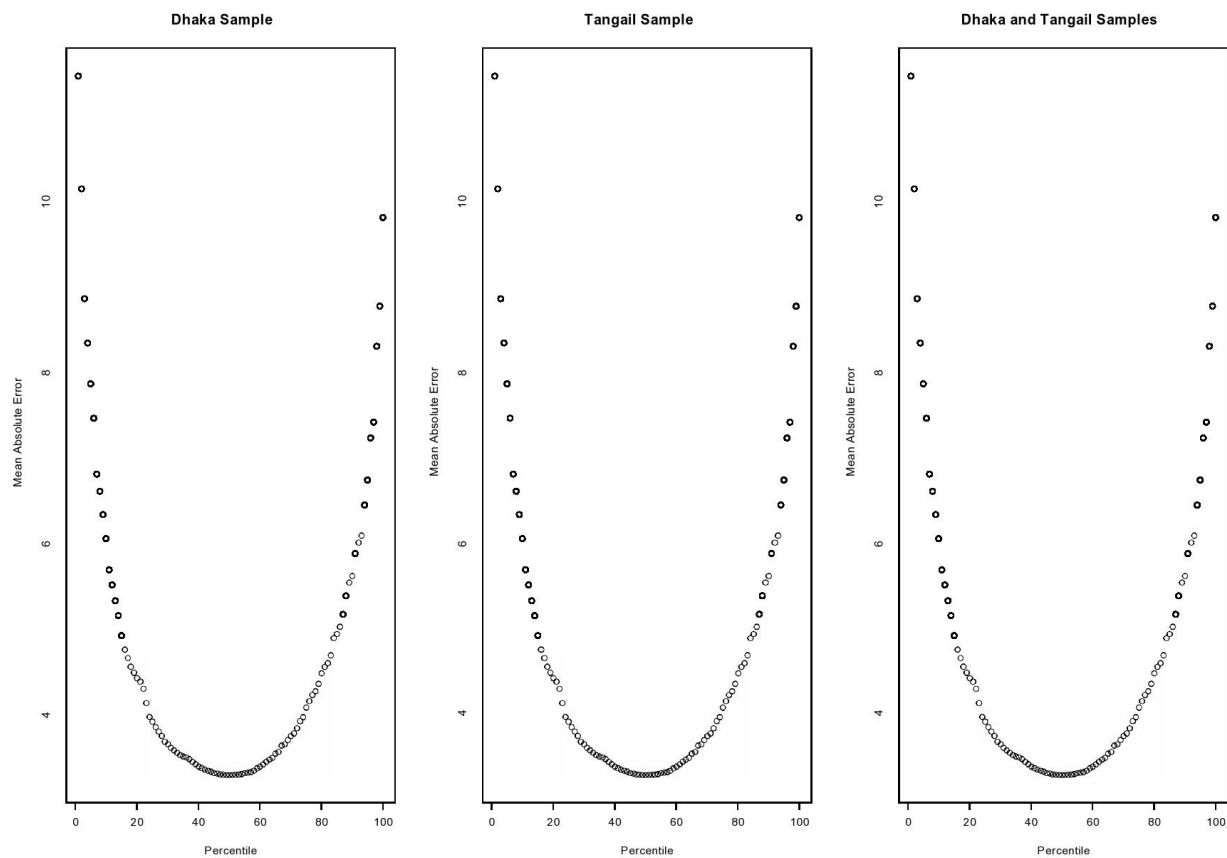

Source: https://medrxiv.org/content/10.1101/2020.05.21.20108704v1.full.pdf
